# Supplementary material for: The Hippo Pathway Effector YAP1 Regulates Intestinal Epithelial Cell Differentiation
Source: MDPI journal article supplement (doi:10.3390/cells9081895), 2020-08-13
Supplement: s1 [file s1]

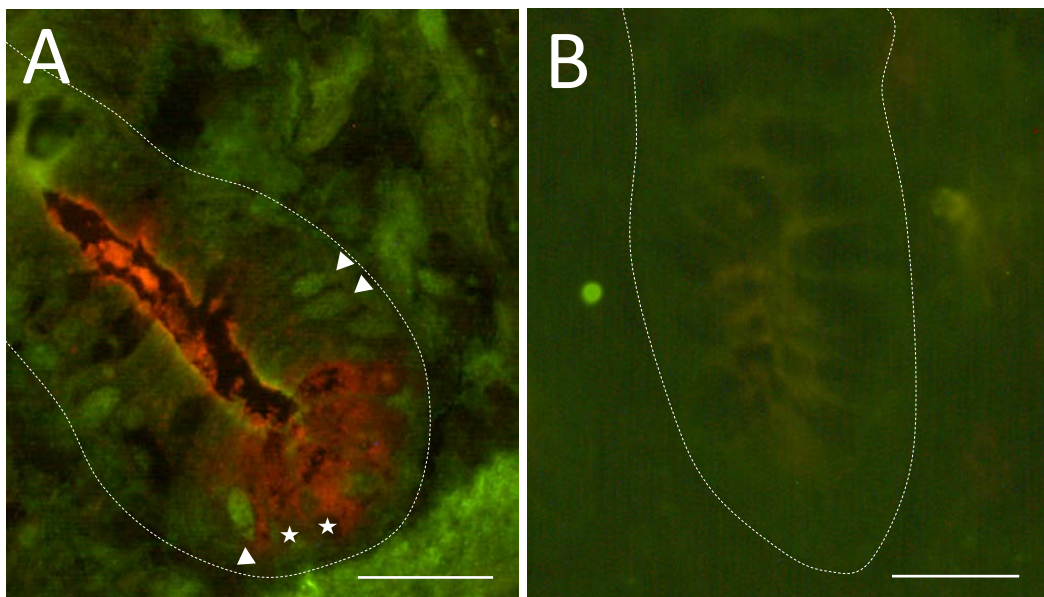

**Figure S1.** Nuclear localization of YAP1/TAZ in human intestinal crypt cells. **A.** Representative immunofluorescence staining for the detection of YAP1/TAZ (green) and DEFA5 (red) in the adult small intestine. Nuclear expression of YAP1/TAZ was observed in some of the cells mainly located at the base of the crypt (arrowheads) devoid of DEFA5 staining. **B.** Corresponding staining of a control section incubated under the same conditions but without primary antibodies. Scale bars = 50  $\mu$ m.
